# Supplementary material for: Determination of melamine based on electrochemiluminescence of Ru(bpy)32+ at chemically converted graphene-modified glassy carbon electrode
Source: Royal Society of Chemistry journal article supplement (doi:10.1039/c4ra03918a), 2014-01-01
Supplement: c4ra03918a1.pdf [file c4ra03918a1.pdf]

## Supporting information

*Fengyu Liu,\* Yulong Gao, Wei Li, Jiantao Shao*

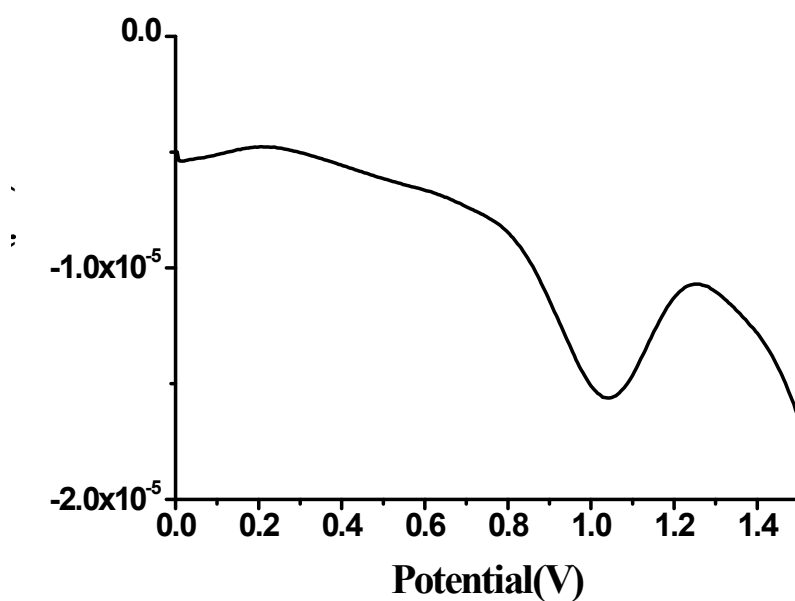

Fig. S1 DPV curve of 1 mM melamine in 0.1 M phosphate buffer (pH 10) at CCG modified GC electrode, Scan rate: 25 mV/s.
